# Supplementary material for: Impact of prehospital orientation of septic shock on 30-day mortality
Source: Research Square preprint supplement (doi:10.21203/rs.3.rs-8236865/v1), 2026-01-30
Supplement: Supplementary file 1 [file 644078a53be8cd83bf004eb9.docx]

**Table 1:** Population characteristics.

Results are expressed by mean and standard deviation for quantitative parameters (normal distribution), by median and interquartile range for quantitative parameters (non-gaussian distribution) and, by absolute value and percentage for qualitative parameters. P-value corresponds to the comparison between deceased and alive patients on day-30.

|  | ***Overall population***  ***(n=587)*** | ***ED admission***  ***(n=260)*** | ***ICU admission***  ***(n=327)*** | *P value* |
| --- | --- | --- | --- | --- |
| Age (years) | 69 ± 15 | 71 ± 16 | 67 ± 14 | **<10-3** |
| Male gender | 370 (63%) | 164 (63%) | 206 (63%) | 0.148 |
| Weight (kg) | 74 ± 20 | 73 ± 21 | 75 ± 20 | **0.007** |
| Height (cm) | 169 ± 11 | 169 ± 9 | 170 ± 13 | 0.288 |
| *Initial prehospital values* | | | | |
| SBP (mmHg) | 96 ± 29 | 100 ± 29 | 93 ± 29 | 0.135 |
| DBP (mmHg) | 57 ± 19 | 61 ± 19 | 55 ± 19 | 0.202 |
| MAP (mmHg) | 70 ± 22 | 74 ± 21 | 67 ± 22 | 0.179 |
| HR (beats.min-1) | 114 ± 29 | 112 ± 28 | 116 ± 29 | 0.408 |
| RR (movements.min-1) | 30 [22 – 36] | 28 [22 – 35] | 32 [25 – 39] | **0.008** |
| Pulse oximetry (%) | 92 [85 – 96] | 93 [87 – 96] | 90 [83 – 95] | **0.003** |
| Body core temperature (°C) | 38.3 [36.1 – 39.1] | 38.4 [36.8 – 39.3] | 38.1 [36.0 – 39.0] | **0.011** |
| Glycemia (mmol.l-1) | 8.5 [6.2 – 12.0] | 8.8 [6.5 – 12.2] | 7.8 [5.8 – 11.2] | **0.023** |
| Glasgow coma scale | 15 [12 – 15] | 15 [13 – 15] | 14 [11 – 15] | **2.10-3** |
| Lactatemia (mmol.l-1) | 5.6 ± 3.5 | 4.3 ± 3.2 | 6.3 ± 3.5 | **0.001** |
| Pre-hospital fluid expansion (ml) | 965 ± 600 | 815 ± 447 | 1064 ± 663 | 0.558 |
| Norepinephrine administration | 174 (30%) | 24 (9%) | 150 (46%) | 0.512 |
| Norepinephrine dose (mg.h-1) | 1.1 [0.6 – 2.0] | 1.0 [0.5 – 2.0] | 1.0 [1.0 – 2.0] | 0.286 |
| Pre-hospital AB administration | 156 (27%) | 59 (23%) | 97 (30%) | 0.423 |
| Pre-hospital duration (min) | 71 ± 34 | 57 ± 24 | 83 ± 36 | 0.070 |
| *Final prehospital values* | | | | |
| SBP (mmHg) | 105 ± 25 | 104 ± 26 | 105 ± 24 | **<10-3** |
| DBP (mmHg) | 62 ± 18 | 62 ± 18 | 62 ± 18 | 0.057 |
| MAP (mmHg) | 76 ± 19 | 76 ± 19 | 76 ± 19 | **0.030** |
| HR (beats.min-1) | 107 ± 25 | 107 ± 24 | 107 ± 26 | 0.313 |
| RR (movements.min-1) | 25 [19 – 30] | 24 [18 – 30] | 26 [20 – 33] | **0.004** |
| Pulse oximetry (%) | 97 [94 – 99] | 97 [95 – 99] | 97 [93 – 99] | **0.003** |
| Body core temperature (°C) | 38.1 [36.0 – 39.0] | 38.2 [37.0 – 39.0] | 37.0 [35.0 – 38.0] | **0.002** |
| Glycemia (mmol.l-1) | 8.0 [6.0 – 10.0] | 8.0 [6.0 – 10.0] | 8.0 [6.0 – 10.5] | 0.491 |
| Glasgow coma scale | 15 [14 – 15] | 15 [14 – 15] | 14 [11 – 15] | **<10-3** |
| Lactatemia (mmol.l-1) | 4.2 ± 3.5 | 3.6 ± 3.0 | 4.7 ± 3.8 | **<10-3** |
|  | | | | |
| In-ICU length of stay (days) | 4 [1 – 8] | 4 [2 – 9] | 2 [1 – 7] | **0.002** |
| In-hospital length of stay (days) | 10 [5 - 18] | 14 [8 – 21] | 4 [2 – 10] | **<10-3** |
| SAPS-2 score | 59 ± 21 | 56 ± 20 | 61 ± 22 | **<10-3** |
| *Comorbidities* | | | | |
| Hypertension | 264 (45%) | 126 (48%) | 138 (43%) | 0.541 |
| Coronary heart disease | 117 (20%) | 57 (22%) | 60 (18%) | **0.033** |
| Chronic cardiac failure | 144 (25%) | 80 (31%) | 64 (20%) | **<10-3** |
| Chronic renal failure | 80 (14%) | 43 (17%) | 37 (11%) | 0.076 |
| COPD | 74 (13%) | 30 (12%) | 44 (13%) | 0.241 |
| Diabetes Mellitus | 171 (29%) | 87 (33%) | 84 (26%) | 0.359 |
| Cancer history | 204 (35%) | 94 (36%) | 110 (34%) | **0.022** |

*Legend: ED=emergency department, ICU=intensive care unit, SBP=systolic blood pressure, DBP=diastolic blood pressure, MBP=mean blood pressure, HR=heart rate, RR=respiratory rate, ICU=intensive care unit, SAPS-2=simplified acute physiology score 2nd version, COPD=chronic obstructive pulmonary disease, ABT=antibiotic therapy, min=minutes.*

*p-value in bold corresponds to a p-value<0.05 between patients admitted to the ED and patients admitted to the ICU.*
