# Supplementary material for: Impact of prehospital orientation of septic shock on 30-day mortality
Source: Research Square preprint supplement (doi:10.21203/rs.3.rs-8236865/v1), 2026-01-30
Supplement: Supplementary file 2 [file de19f197aca72ade98ec3cfa.docx]

**Table 2:** Suspected prehospital septic shock origins.

| ***Origin*** | ***n (percentage)*** |
| --- | --- |
| Pulmonary | 244 (42%) |
| Digestive | 150 (26%) |
| Urinary | 101 (17%) |
| Cutaneous | 38 (6%) |
| Meningeal | 12 (2%) |
| Gynaecological | 4 (1%) |
| ENT | 2 (0.5%) |
| Cardiac | 2 (0.5) |
| Unknown | 34 (5%) |

*Legend: ENT: ear nose throat*
